# Supplementary material for: Evaluation of intervention fidelity of a complex psychosocial intervention Lifestyle Matters: a randomised controlled trial
Source: HighWire-hosted journal article supplement (doi:10.1136/bmjopen-2020-043478), 2021-04-01
Supplement: bmjopen-2020-043478supp001_data_supplement.pdf [file bmjopen-2020-043478supp001_data_supplement.pdf]

# Lifestyle Matters Additional File 1

## Contents

Document 1: Lifestyle Matters training delivery observation checklist..... 2

Document 2: Lifestyle Matters intervention delivery video checklist..... 3

## Document 1: Lifestyle Matters training delivery observation checklist

| TRAINER                                                                                                                   |                                                                                                                                                                                         |
|---------------------------------------------------------------------------------------------------------------------------|-----------------------------------------------------------------------------------------------------------------------------------------------------------------------------------------|
| Domain                                                                                                                    | Criteria                                                                                                                                                                                |
| Trainer                                                                                                                   | 1. The trainer is the same for all training                                                                                                                                             |
|                                                                                                                           | 2. The trainer is an author of the programme                                                                                                                                            |
|                                                                                                                           | 3. Demonstrates a range of group work skills (didactic teaching, peer sharing, interactive activities, active experimentation etc)                                                      |
| Materials                                                                                                                 | 4. PowerPoint presentations and materials directly relate to the goals of the training                                                                                                  |
|                                                                                                                           | 5. Provides a CD of training content and materials to all trainees                                                                                                                      |
| Tailoring                                                                                                                 | 6. Training is tailored to recipients' skill level, experience or work background                                                                                                       |
|                                                                                                                           | 7. Training is tailored in response to the observed needs of the trainees, and feedback from the trainees during the sessions                                                           |
| Content                                                                                                                   | 8. The goals of the training are covered                                                                                                                                                |
|                                                                                                                           | 9. Examples of the core themes and examples of subsidiary themes are covered                                                                                                            |
|                                                                                                                           | 10. Mandatory themes are covered:                                                                                                                                                       |
|                                                                                                                           | <ul style="list-style-type: none"> <li>• A celebration of achievements</li> <li>• Activity and health</li> <li>• Endings</li> </ul>                                                     |
| TRAINEES                                                                                                                  |                                                                                                                                                                                         |
| (Performance in discussion, role play, problem solving, expressive exercises, reflective exercises shared, written tests) |                                                                                                                                                                                         |
| Domain                                                                                                                    | Criteria                                                                                                                                                                                |
| Understanding                                                                                                             | 11. Critically discuss demographic changes and the concept of active ageing                                                                                                             |
|                                                                                                                           | 12. Discuss the evidence for Lifestyle matters                                                                                                                                          |
|                                                                                                                           | 13. Identify the ideas that are key to Lifestyle Matters, including                                                                                                                     |
|                                                                                                                           | <ul style="list-style-type: none"> <li>• enabling group members to do things for themselves</li> <li>• transferring skills from the safety of the group to their wider lives</li> </ul> |
| Self-awareness                                                                                                            | 14. Discuss the content of the Lifestyle Matters manual and how to apply it                                                                                                             |
|                                                                                                                           | 15. Share their prior expertise, hopes and expectations of the training                                                                                                                 |
|                                                                                                                           | 16. Share their own perceptions of ageing and how this may impact on the programme                                                                                                      |
| Skill acquisition                                                                                                         | 17. Reflect on and share their own facilitation style and skills                                                                                                                        |
|                                                                                                                           | 18. Use the LifeStyle Matters manual to practice planning sessions within themes                                                                                                        |
|                                                                                                                           | 19. Identify how to locate and access community resources                                                                                                                               |
| Group work                                                                                                                | 20. Respond to potential scenarios, using creative problem solving and considering individual needs (including risk taking)                                                             |
|                                                                                                                           | 21. Understand and demonstrate a range of group work skills (didactic teaching, peer sharing, interactive activities, active experimentation etc)                                       |
|                                                                                                                           | 22. Understand and demonstrate how to manage group dynamics                                                                                                                             |
|                                                                                                                           | 23. Understand and demonstrate an enabling style of group facilitation                                                                                                                  |
| Individual sessions                                                                                                       | 24. Demonstrate how to tailor the intervention to the needs and choices of group members                                                                                                |
| Group outings                                                                                                             | 25. Explore the value of 1:1 sessions and potential activities to use in these                                                                                                          |
| Reflection & evaluation                                                                                                   | 26. Explore the value of outings and how to help group members to plan them                                                                                                             |
|                                                                                                                           | 27. Explore reflective practice and discuss its value                                                                                                                                   |
| Supervision                                                                                                               | 28. Practice evaluating and planning actions                                                                                                                                            |
|                                                                                                                           | 29. Discuss the value and principles of supervision                                                                                                                                     |

## Document 2: Lifestyle Matters intervention delivery video checklist

| FACILITATOR                |                                                                                                                     |
|----------------------------|---------------------------------------------------------------------------------------------------------------------|
| Domain                     | Criteria                                                                                                            |
| Resources                  | 30. Two facilitators deliver                                                                                        |
| Personal qualities         | 31. Shows warmth and empathy                                                                                        |
|                            | 32. Listens actively and respectfully                                                                               |
| Enabling                   | 33. builds on the assets, skills and abilities that each person brings                                              |
|                            | 34. Encourages the group to make choices                                                                            |
| Group work skills          | 35. Facilitates communication and interaction (to ground rules?)                                                    |
|                            | 36. Draws in quiet members of the group                                                                             |
|                            | 37. Facilitates peer exchange and guidance, and peer modelling                                                      |
|                            | 38. Manages space, time and opportunity effectively                                                                 |
|                            | 39. Facilitates the members to explore differences between them, or conflict and resolution                         |
| Goals and needs            | 40. Builds mutual support and group cohesion                                                                        |
|                            | 41. Balances meeting individual needs and goals and group needs                                                     |
|                            | 42. Balances sufficient challenge in activities with ensuring they are achievable                                   |
| Content                    | 43. Tailors activities to the needs of members                                                                      |
|                            | 44. Focuses on the themes in the programme, or new themes chosen by group members                                   |
|                            | 45. Uses group activities, not just discussion (activities from the manual or from elsewhere)                       |
|                            | 46. With members, selects and plans group outings that explore and extend the themes in the programme               |
| GROUP MEMBERS              |                                                                                                                     |
| Domain                     | Criteria                                                                                                            |
| Understanding              | 47. The relationship between activity, health and aging, or one of the other themes from the programme              |
| Occupational self-analysis | 48. Analyse their own daily occupations (their significance, impact on health, components) and make choices         |
|                            | 49. Sharing and reflecting on experiences of participating in activities (Occupational storytelling)                |
| Goal setting               | 50. Own goals identified within the group and within activities                                                     |
| Grading and layering       | 51. Grading and layering of activities to constantly revisit and extend skills and build confidence                 |
| Mutual support             | 52. Show mutual appreciation and support                                                                            |
| Creativity                 | 53. Practice any of: self-expression, innovation, problem solving and adaptation within the safety of the group     |
|                            | 54. Engage in enjoyable and stimulating activities                                                                  |
| Older people as experts    | 55. Acknowledge and appreciate their own skills and how they can contribute to the group                            |
|                            | 56. Bring in and share their own skills and knowledge                                                               |
|                            | 57. Group members in turn take leadership or contribute ideas                                                       |
| Transfer to everyday life  | 58. build skills, solutions or confidence within the group                                                          |
|                            | 59. Report the transferring of skills, solutions or confidence from the group to wider life                         |
| Change over time           | 60. Plans for individuals are taken forward, whilst respecting each person's need to balance opportunities and risk |
| Confidence and hope        | 61. Achievements are celebrated                                                                                     |
|                            | 62. Adventures and dreams are welcomed                                                                              |
